# Supplementary material for: Full-Length SMRT Transcriptome Sequencing and SSR Analysis of Bactrocera dorsalis (Hendel)
Source: MDPI journal article supplement (doi:10.3390/insects12100938), 2021-10-14

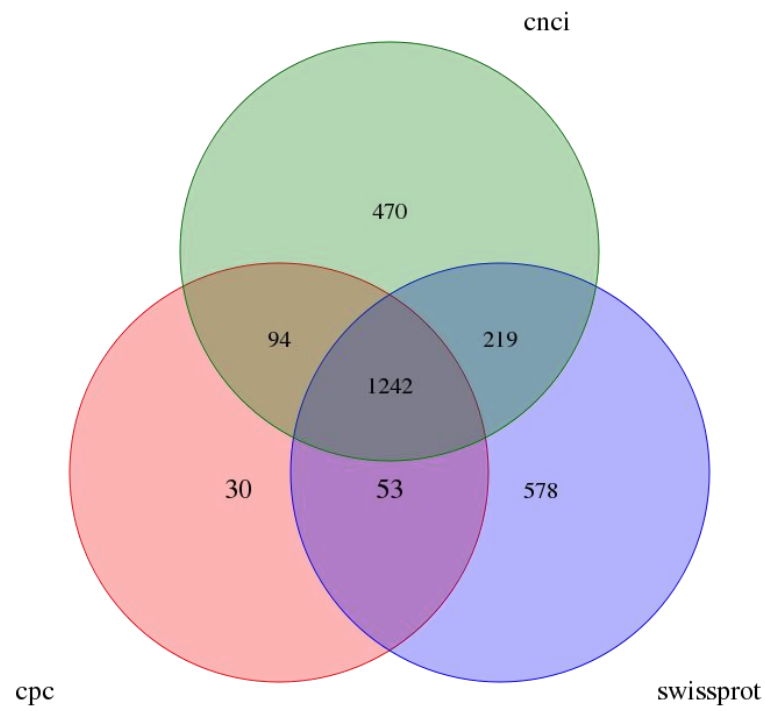

**Figure S1.** The Venn diagram of the number of lncRNAs predicted by CPC, CNCI and Swissprot.

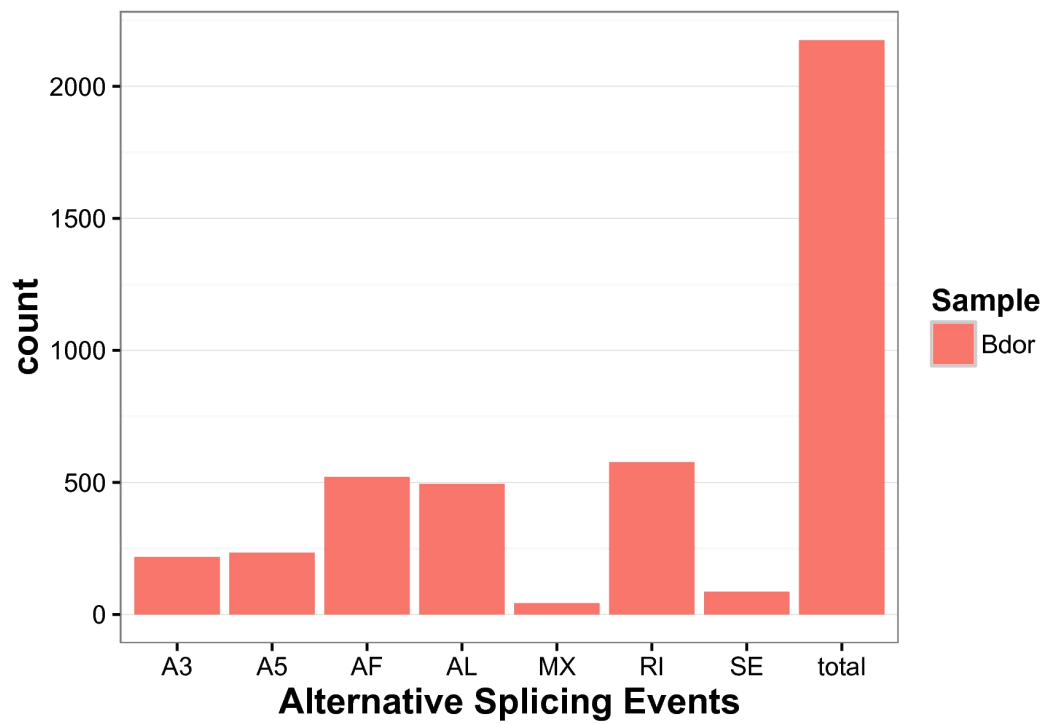

**Figure S2.** Classification and quantity statistics graph of alternative splicing events.

**Table S1.** Performance summary of 80 EST-SSRs with 174 *B. dorsalis* samples via nondenaturing polyacrylamide gel electrophoresis.

| Classified information       | Primer name | Electrophoretic diagram number |
|------------------------------|-------------|--------------------------------|
| Ungenerated product          | 1114ACAT4   | Picture 8                      |
|                              | 3284GGC5    | Picture 11                     |
|                              | 4910ACA5    | Picture 7                      |
|                              | 4970AT6     | Picture 7                      |
|                              | 5405CATA4   | Picture 20                     |
| Poor universal applicability | 2904CTCA4   | Picture 10                     |
|                              | 3879TGG5    | Picture 2                      |
|                              | 4782GGTGGC4 | Picture 7, 8                   |
|                              | 5247AGGC4   | Picture 6                      |
|                              | 5452TATG4   | Picture 6, 8                   |
|                              | 5777GAT6    | Picture 7                      |
| Multiple bands               | 2767TATG4   | Picture 7                      |
|                              | 4613CAG5    | Picture 3                      |
|                              | 4835ATAC4   | Picture 4,5                    |
| Monomorphic bands            | 863CGC5     | Picture 2, 12, 19-20           |
|                              | 1131TATG4   | Picture 7                      |
|                              | 1365TATG4   | Picture 4,5                    |
|                              | 2199ATTG4   | Picture 3, 12                  |
|                              | 2553ACAT4   | Picture 21-24                  |
|                              | 2923GGC5    | Picture 11                     |
|                              | 3150TACA4   | Picture 3,4,6                  |
|                              | 3533ACAT4   | Picture 4,5                    |
|                              | 3668TATG4   | Picture 7, 29-31               |
|                              | 3923CAA5    | Picture 7                      |
|                              | 4756AAG6    | Picture 4,5                    |
|                              | 5769TA6     | Picture 1,32                   |
| Unstable and unclear         | 559AAAT4    | Picture 5                      |
|                              | 1314CATA5   | Picture 12,32                  |
|                              | 1411CAA6    | Picture 2, 9                   |
|                              | 2170ATAC4   | Picture 8                      |
|                              | 3495ATGT4   | Picture 8                      |
|                              | 3721CAC6    | Picture 8                      |
|                              | 4434TATG4   | Picture 10                     |
|                              | 4771ACAT4   | Picture 10                     |
|                              | 4867TGA5    | Picture 3, 11                  |
|                              | 5346TCGC4   | Picture 8                      |
|                              | 5369TAA6    | Picture 1,32                   |
|                              | 5512CAA6    | Picture 11                     |
|                              | 5749TTAAT5  | Picture 2                      |
| Stable and unclear           | 84GGC6      | Picture 12                     |
|                              | 1104AAC6    | Picture 10                     |

|             |                     |
|-------------|---------------------|
| 1807ATAC5   | Picture 3, 12       |
| 2327TACA4   | Picture 8           |
| 2402ATTT4   | Picture 9           |
| 2859ACAT4   | Picture 4,5         |
| 2922TACA4   | Picture 7           |
| 2923CAG5    | Picture 11          |
| 2923TACA4   | Picture 7           |
| 2924TACA4   | Picture 25-28       |
| 3194CAAGAG4 | Picture 11          |
| 3393AGC5    | Picture 11          |
| 3402AAAC4   | Picture 10, 13      |
| 3695GCTCCA4 | Picture 9           |
| 3866TATG4   | Picture 8, 33-36    |
| 3954ACAT4   | Picture 10          |
| 4367CAG5    | Picture 7           |
| 4371ACAT4   | Picture 6, 37-40    |
| 4461GCT6    | Picture 10          |
| 4478AAC5    | Picture 9           |
| 4488ATAC5   | Picture 10          |
| 4513ATAC4   | Picture 8, 20       |
| 4606CAG5    | Picture 3, 12       |
| 4611CAG5    | Picture 3, 12       |
| 4614CAG5    | Picture 12          |
| 4621AT7     | Picture 6           |
| 4621CAG5    | Picture 2, 3, 11    |
| 4654TATG4   | Picture 8           |
| 4707AC6     | Picture 2, 10       |
| 4731ACAT4   | Picture 4, 5        |
| 4777ATAC4   | Picture 6, 8, 14-16 |
| 4932CATA4   | Picture 32          |
| 4950CAA5    | Picture 2, 9        |
| 4926TA7     | Picture 1, 8, 17-18 |
| 4980CA7     | Picture 3,6         |
| 4992CAA5    | Picture 32          |
| 5040ATAC4   | Picture 2, 9        |
| 5126TACA4   | Picture 6           |
| 5257TAG5    | Picture 3, 11       |
| 5749GCT5    | Picture 1           |
| 5805AGC5    | Picture 1, 9        |

---

Note: Referring to Figure S3 for electrophoretic diagram information.

**Figure S3.** Electrophoretogram of nondenaturing polyacrylamide gel.

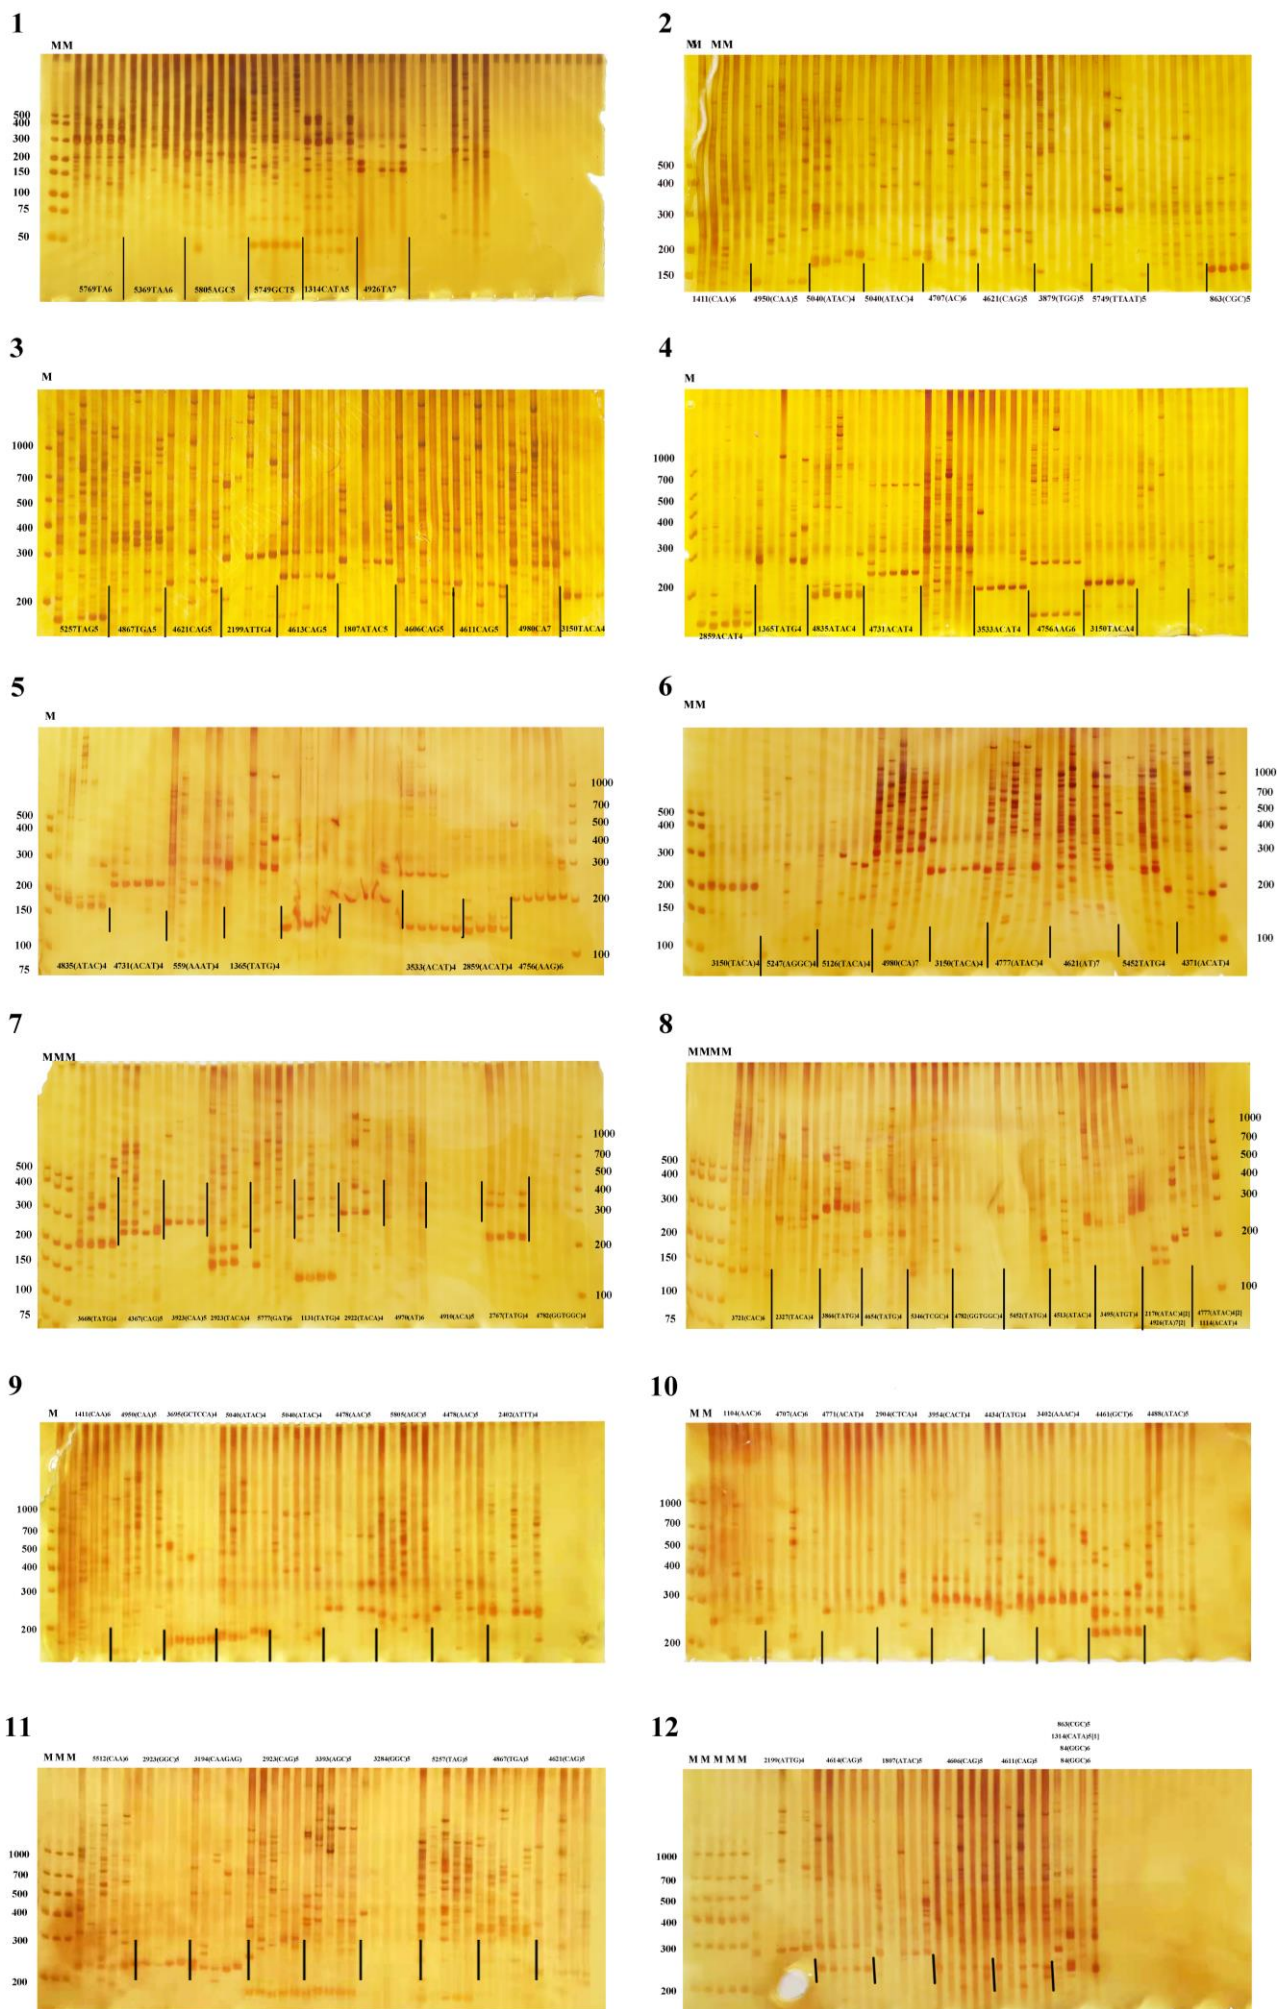

13

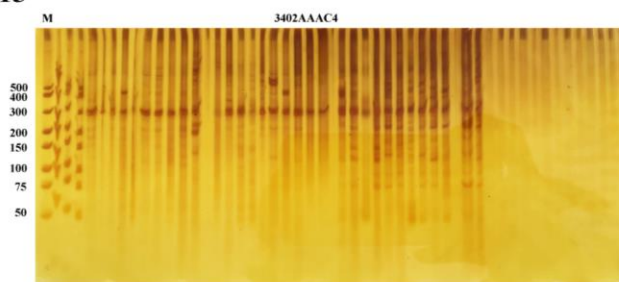

14

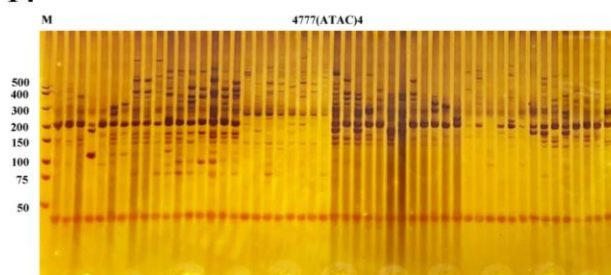

15

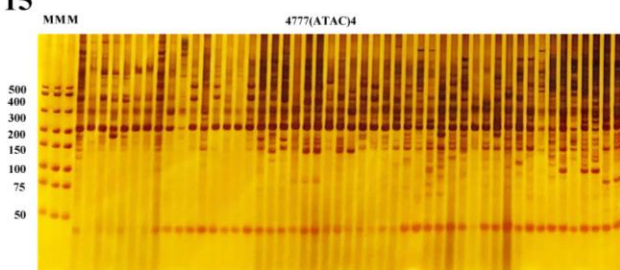

16

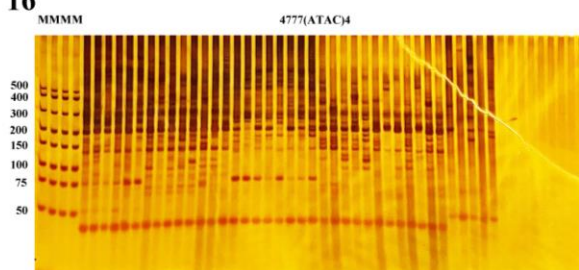

17

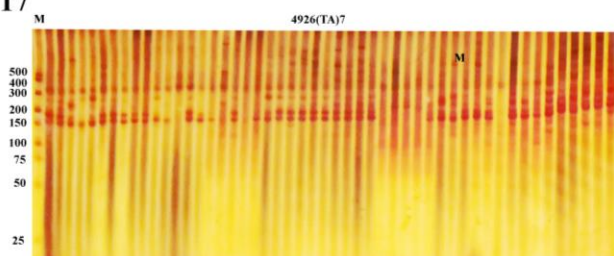

18

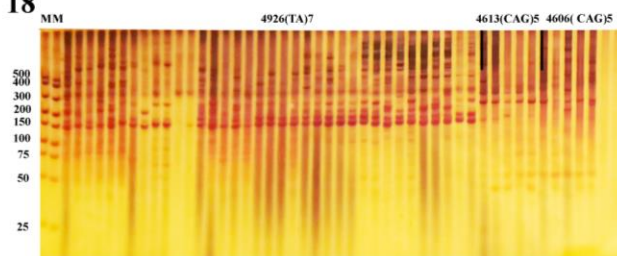

19

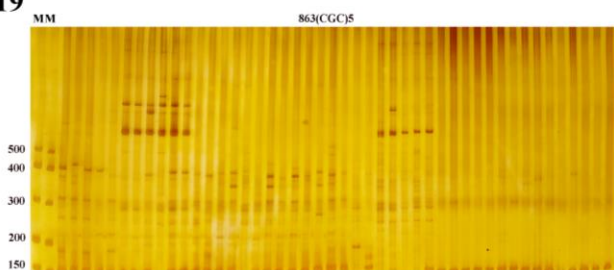

20

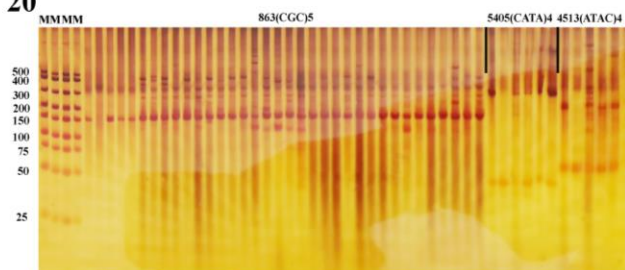

21

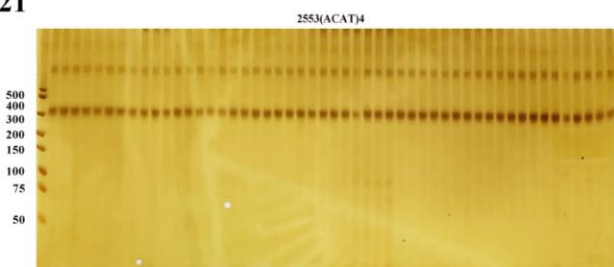

22

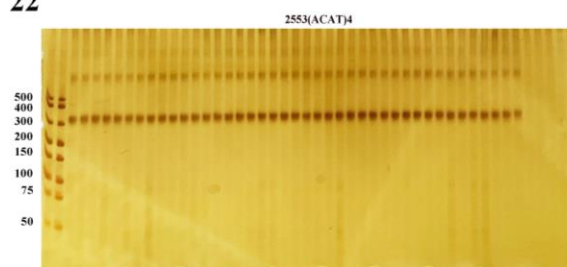

23

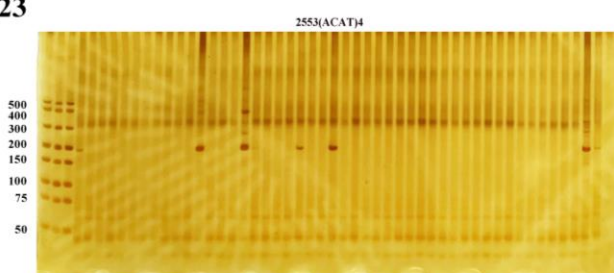

24

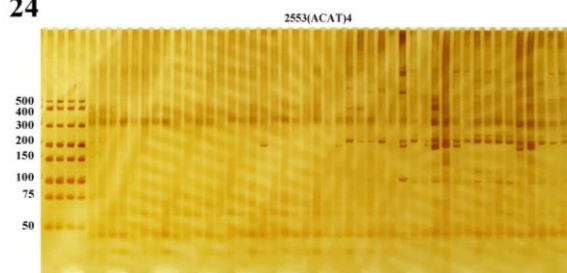

25

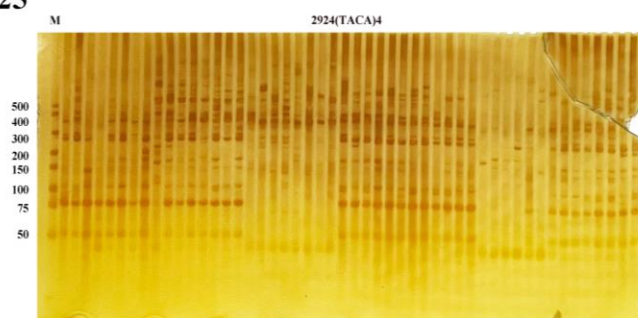

26

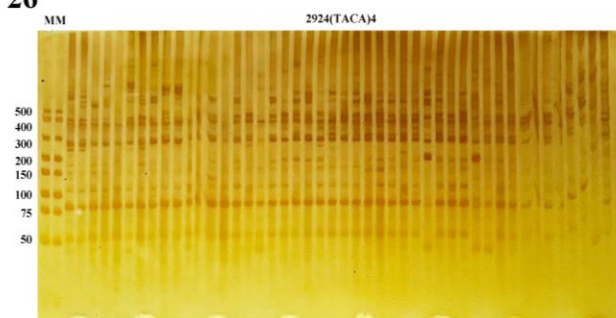

27

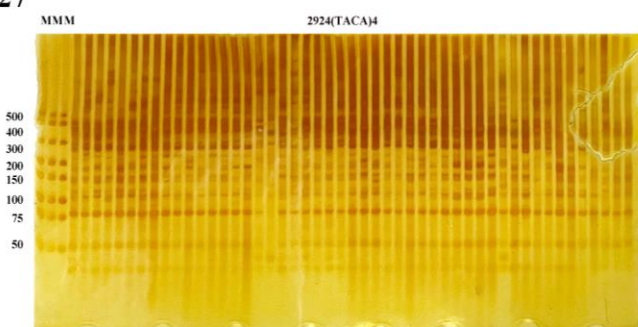

28

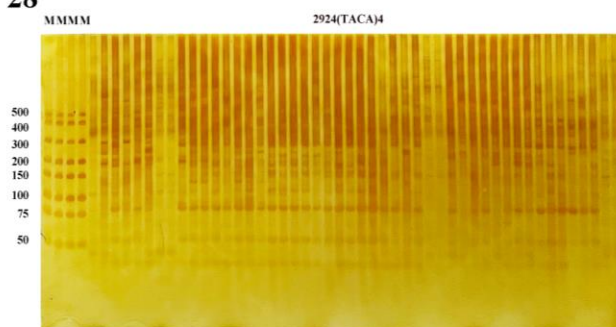

29

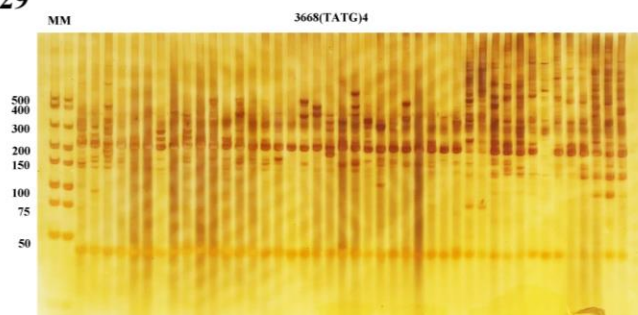

30

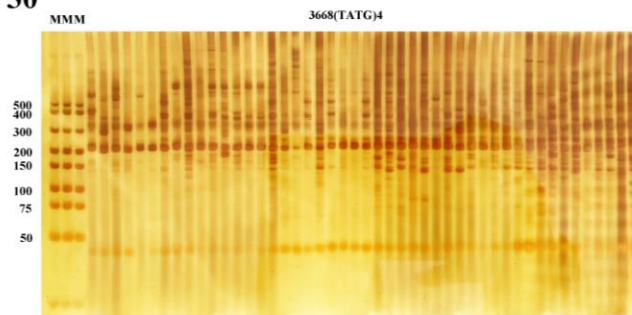

31

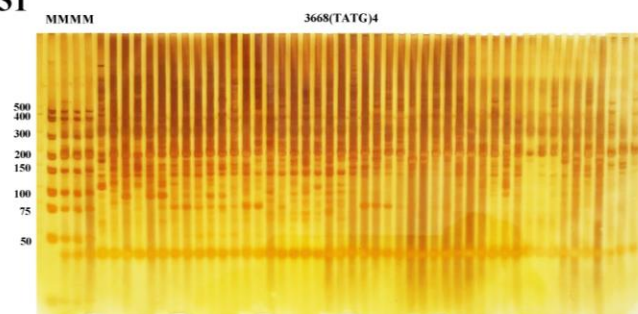

32

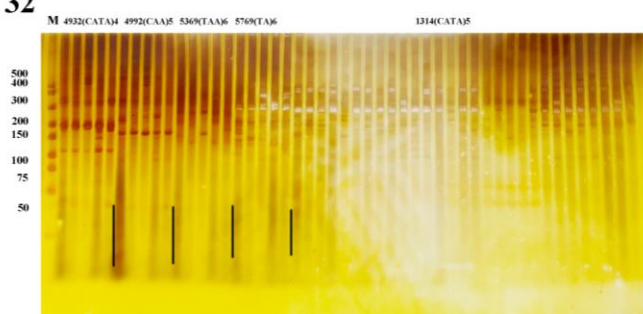

33

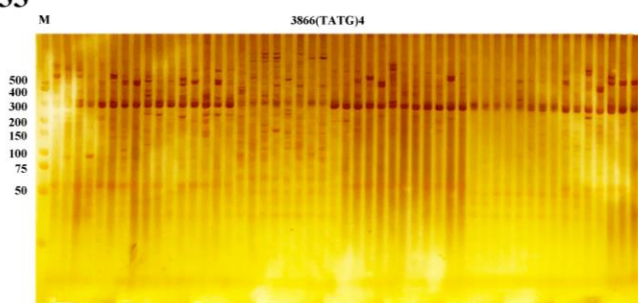

34

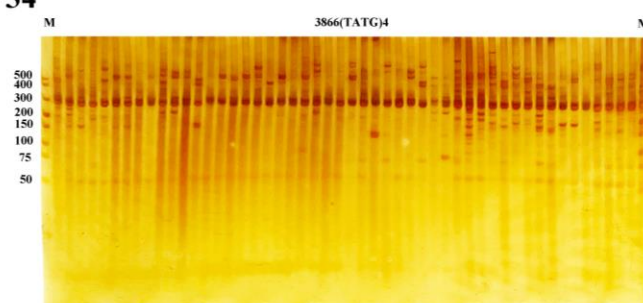

35

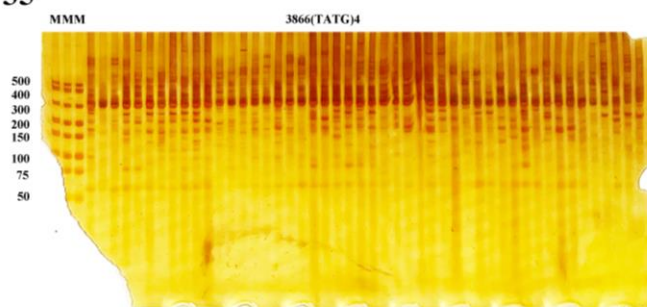

36

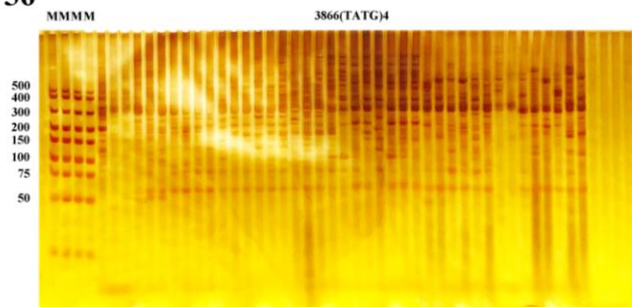

37

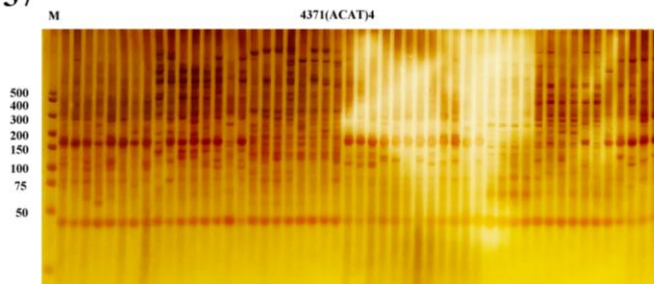

38

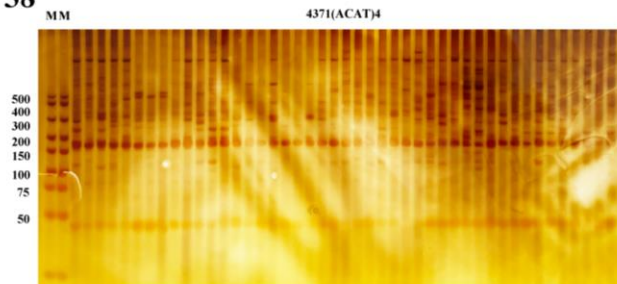

39

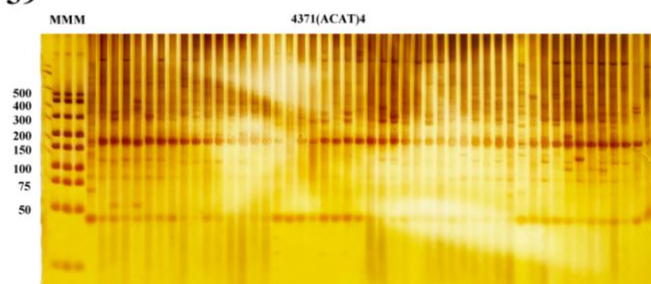

40

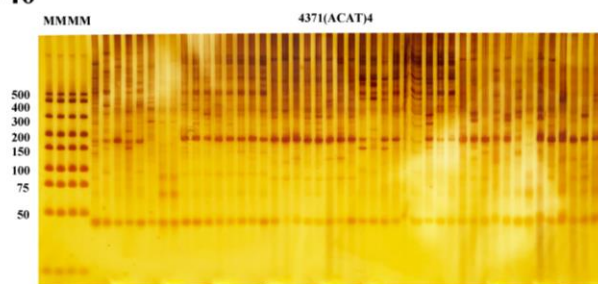

Supplement: s1 [file s1]
